# Supplementary material
Source: publisher figshare collection journal article supplement (https://asha.figshare.com/articles/dataset/_/16589864)
Supplement: Supplementary file 1 [file 1]

**Supplemental Material S1.** Patient characteristics with significant pairwise group differences.

| Characteristic        | Group differences                               | Post hoc test  | <i>p</i> value   |
|-----------------------|-------------------------------------------------|----------------|------------------|
| Age                   | Therapy < Evaluation                            | Tukey's HSD    | .0245*           |
| Diagnosis             | Therapy ≠ Evaluation                            | Fisher's exact | .0155†           |
| Multiple diagnoses    | Counseling > Evaluation                         | Fisher's exact | .0068†           |
| GRBAS G               | Therapy < Evaluation<br>Counseling < Evaluation | DSCF method    | .0262*<br>.0046* |
| VHI                   | Therapy < Evaluation                            | Tukey's HSD    | .0002*           |
| EAT-10                | Therapy < Counseling Therapy<br>< Evaluation    | DSCF method    | .0175*<br>.0484* |
| Prior procedures      | Therapy > Counseling<br>Therapy > Evaluation    | DSCF method    | .0001*<br>.0248* |
| Procedure             | Therapy ≠ Evaluation                            | Fisher's exact | .0022†           |
| Unilateral procedure‡ | Therapy < Evaluation<br>Counseling < Evaluation | Fisher's exact | .0016†<br>.0012† |

*Note.* Results of post hoc tests and adjustments for multiple comparisons. Tukey's HSD = honestly significant difference, post hoc test for ANOVA; DSCF = Dwass, Steel, Critchlow-Fligner method, post hoc test for Kruskal-Wallis; GRBAS = Grade, Roughness, Breathiness, Asthenia, Severity scale; VHI = Voice Handicap Index; EAT-10 = Eating Assessment Tool.

\**p* < .05.

†Significant difference with *p* < Bonferroni-adjusted  $\alpha = .05 / 3 = .0167$  for multiple pairwise Fisher's exact tests.

‡Missing data for 10 participants.
