# Supplementary material
Source: publisher figshare collection journal article supplement (https://asha.figshare.com/articles/dataset/_/16589864)
Supplement: Supplementary file 3 [file 1]

**Supplemental Material S8.** Effects of therapy group and voice rest on humming.

| Simple effect                                         | OR (95% CI)                   | <i>p</i> value |
|-------------------------------------------------------|-------------------------------|----------------|
| <b>Simple effects within Group × Time interaction</b> |                               |                |
| <i>Effects of therapy group at each timepoint</i>     |                               |                |
| Baseline                                              |                               |                |
| Counseling vs. Therapy                                | 0.782 (0.111-5.533)           | .9513          |
| Therapy vs. Evaluation                                | > 999,999 (0.015-> 999,999)   | .0087*         |
| Counseling vs. Evaluation                             | > 999,999 (0.012-> 999,999)   | .0052*         |
| Voice rest                                            |                               |                |
| Counseling vs. Therapy                                | 2.332 (0.061-88.960)          | .9976          |
| Therapy vs. Evaluation                                | > 999,999 (< 0.001-> 999,999) | .3326          |
| Counseling vs. Evaluation                             | > 999,999 (< 0.001-> 999,999) | .3251          |
| <i>Effect of voice rest within each therapy group</i> |                               |                |
| Therapy: Voice rest vs. Baseline                      | <. 001 (< .001-< .001)        | < .0001*       |
| Counseling: Voice rest vs. Baseline                   | < .001 (< .001-< .001)        | < .0001*       |
| Evaluation: Voice rest vs. Baseline                   | 0.045 (0.004-0.544)           | < .0001*       |

\*Adjusted *p* < .05 for simple effects of Group and Time within significant Group × Time interaction in mixed model for humming after Tukey adjustments for multiple comparisons.
