# Supplementary material
Source: publisher figshare collection journal article supplement (https://asha.figshare.com/articles/dataset/_/16589864)
Supplement: Supplementary file 4 [file 1]

**Supplemental Material S6.** Mixed models for whispering, coughing, and throat clearing before and during voice rest.

| <b>Behavior</b> | <b>Effect</b>   | <b>Estimate ± SE</b> | <b><i>p</i> value</b> |
|-----------------|-----------------|----------------------|-----------------------|
| Whispering      | Intercept       | 21.889 ± 4.131       | < .0001*              |
|                 | Group           |                      | .0118*                |
|                 | Therapy         | -14.117 ± 5.225      |                       |
|                 | Counseling      | -12.583 ± 5.386      |                       |
|                 | Evaluation      | Reference            |                       |
|                 | Time            |                      | .6974                 |
|                 | Baseline        | Reference            |                       |
| Voice rest      | -4.937 ± 5.616  |                      |                       |
|                 | Group × Time    |                      | .6759                 |
| Coughing        | Intercept       | 46.222 ± 5.353       | < .0001*              |
|                 | Group           |                      | .0053*                |
|                 | Therapy         | -26.994 ± 6.772      |                       |
|                 | Counseling      | -16.883 ± 6.980      |                       |
|                 | Evaluation      | Reference            |                       |
|                 | Time            |                      | < .0001*              |
|                 | Baseline        | Reference            |                       |
| Voice rest      | -16.080 ± 4.547 |                      |                       |
|                 | Group × Time    |                      | .0639                 |
| Throat clearing | Intercept       | 51.508 ± 5.380       | < .0001*              |
|                 | Group           |                      | .0175*                |
|                 | Therapy         | -24.794 ± 6.805      |                       |
|                 | Counseling      | -12.749 ± 7.064      |                       |
|                 | Evaluation      | Reference            |                       |
|                 | Time            |                      | < .0001*              |
|                 | Baseline        | Reference            |                       |
| Voice rest      | -24.461 ± 5.819 |                      |                       |
|                 | Group × Time    |                      | .0746                 |

\**p* < .05 for Type 3 effect in mixed models with voice behavior as the response variable, Group, Time, and Group × Time interaction as fixed effects and participant as repeated measures.
