# Supplementary material
Source: publisher figshare collection journal article supplement (https://asha.figshare.com/articles/dataset/_/16589864)
Supplement: Supplementary file 5 [file 1]

**Supplemental Material S7.** Mixed logistic models for singing, humming, and yelling before and during voice rest.

| <b>Behavior</b> | <b>Effect</b>               | <b>OR (95% CI)</b>            | <b><i>p</i> value</b> |
|-----------------|-----------------------------|-------------------------------|-----------------------|
| Singing         | Intercept                   |                               | .0102*                |
|                 | Group                       |                               | .1713                 |
|                 | Therapy                     | > 999,999 (< 0.001-> 999,999) |                       |
|                 | Counseling                  | > 999,999 (< 0.001-> 999,999) |                       |
|                 | Evaluation                  | Reference                     |                       |
|                 | Time                        |                               | .9703                 |
|                 | Baseline                    | Reference                     |                       |
| Voice rest      | 0.001 (< 0.001 - > 999,999) |                               |                       |
|                 | Group × Time                |                               | .9992                 |
| Humming†        | Intercept                   |                               | .0194*                |
|                 | Group                       |                               | .3948                 |
|                 | Therapy                     | > 999,999 (< 0.001-> 999,999) |                       |
|                 | Counseling                  | > 999,999 (< 0.001-> 999,999) |                       |
|                 | Evaluation                  | Reference                     |                       |
|                 | Time                        |                               | < .0001*              |
|                 | Baseline                    | Reference                     |                       |
| Voice rest      | < .001 (< 0.001-< 0.001)    |                               |                       |
|                 | Group × Time                |                               | < .0001*              |
| Yelling         | Intercept                   |                               | .0321*                |
|                 | Group                       |                               | .7042                 |
|                 | Therapy                     | 1.927 (0.407-9.120)           |                       |
|                 | Counseling                  | 1.507 (0.314-7.236)           |                       |
|                 | Evaluation                  | Reference                     |                       |
|                 | Time                        |                               | .0023*                |
|                 | Baseline                    | Reference                     |                       |
| Voice rest      | 0.145 (0.043-0.492)         |                               |                       |
|                 | Group × Time                |                               | .7553                 |

\* $p < .05$  for Type 3 effect in mixed logistic models with voice behavior as the response variable, Group, Time, and Group × Time interaction as fixed effects, and participant as repeated measures.

†Main effects of Group and Time on humming should be interpreted cautiously in the context of significant Group × Time interaction effect. See simple effects within Group × Time interaction in Supplemental Material S7.
