# Supplementary material
Source: publisher figshare collection journal article supplement (https://asha.figshare.com/articles/dataset/_/16589864)
Supplement: Supplementary file 6 [file 1]

**Supplemental Material S3.** Mixed models for talking by measures of preprocedure dysphonia and dysphagia severity.

| Variable   | Effect         | Estimate ± SE    | p value  | Models for Talking                                                                            |
|------------|----------------|------------------|----------|-----------------------------------------------------------------------------------------------|
| VHI        | Intercept      | 92.619 ± 6.754   | < .0001* | Baseline:<br>92.619 + (-0.201 × VHI)                                                          |
|            | Time           |                  | < .0001* |                                                                                               |
|            | Baseline       | Reference        |          | Voice rest:<br>(92.619 – 75.900) + ((-0.202 + 0.320) × VHI)<br>= 16.719 + (0.118 × VHI)       |
|            | Voice rest     | -75.900 ± 9.552  |          |                                                                                               |
|            | VHI            | -0.201 ± 0.105   | .5815    |                                                                                               |
|            | VHI × Time     |                  | .0345*   |                                                                                               |
|            | Baseline       | Reference        |          |                                                                                               |
| Voice rest | 0.320 ± 0.149  |                  |          |                                                                                               |
| GRBAS G    | Intercept      | 91.870 ± 7.154   | < .0001* | Baseline:<br>91.870 + (-5.578 × G)                                                            |
|            | Time           |                  | < .0001* |                                                                                               |
|            | Baseline       | Reference        |          | Voice rest:<br>(91.870 – 79.587) + ((-5.578 + 11.284) × G)<br>= 12.283 + (5.706 × G)          |
|            | Voice rest     | -79.587 ± 10.117 |          |                                                                                               |
|            | GRBAS G        | -5.578 ± 3.326   | .9785    |                                                                                               |
|            | GRBAS G × Time |                  | .0186*   |                                                                                               |
|            | Baseline       | Reference        |          |                                                                                               |
| Voice rest | 11.284 ± 4.703 |                  |          |                                                                                               |
| EAT-10     | Intercept      | 84.760 ± 2.861   | < .0001* | Baseline:<br>84.760 + (-0.861 × EAT-10)                                                       |
|            | Time           |                  | < .0001* |                                                                                               |
|            | Baseline       | Reference        |          | Voice rest:<br>(84.760 – 61.979) + ((-0.861 + 1.077) × EAT-10)<br>= 22.781 + (0.216 × EAT-10) |
|            | Voice rest     | -61.979 ± 4.046  |          |                                                                                               |
|            | EAT-10         | -0.861 ± 0.316   | .1523    |                                                                                               |
|            | EAT-10 × Time  |                  | .0182*   |                                                                                               |
|            | Baseline       | Reference        |          |                                                                                               |
| Voice rest | 1.077 ± 0.447  |                  |          |                                                                                               |

*Note.* VHI = Voice Handicap Index total score, range 0-120; GRBAS = Grade, Roughness, Breathiness, Asthenia, Severity scale, range 0-3; EAT-10 = Eating Assessment Tool, range 0-40.

\**p* < .05 for Type 3 effect in mixed models with Talking as the response variable and participant as repeated measures.
