# Supplementary material
Source: publisher figshare collection journal article supplement (https://asha.figshare.com/articles/dataset/_/16589864)
Supplement: Supplementary file 7 [file 1]

**Supplemental Material S4.** Spearman correlations ( $r_s$ ) and  $p$  values between confounding variables.

|                    | Age   | Employment        | Diagnosis      | Multiple diagnoses | Procedure        | Prior procedures | GRBAS G         | VHI              | EAT-10           |
|--------------------|-------|-------------------|----------------|--------------------|------------------|------------------|-----------------|------------------|------------------|
| Age                | 1.000 | -.665<br>< .0001* | -.188<br>.0835 | .019<br>.8619      | -.287<br>.0075*  | -.137<br>.2096   | .120<br>.0649   | .238<br>.0271*   | .217<br>.0466*   |
| Employment         |       | 1.000             | .046<br>.6736  | -0.182<br>.0938    | .291<br>.0065*   | .174<br>.1085    | -.167<br>.1254  | -.288<br>.0072*  | -.305<br>.0042*  |
| Diagnosis          |       |                   | 1.000          | .151<br>.1648      | .433<br>< .0001* | .025<br>.8056    | -.141<br>.1953  | -.152<br>.1631   | -.234<br>.0300*  |
| Multiple diagnoses |       |                   |                | 1.000              | -.005<br>.9610   | -.027<br>.8056   | -0.063<br>.5614 | -.053<br>.6259   | -.017<br>.8758   |
| Procedure          |       |                   |                |                    | 1.000            | .369<br>.0005*   | -.314<br>.0032* | -.270<br>.0118*  | -.307<br>.0041*  |
| Prior procedures   |       |                   |                |                    |                  | 1.000            | -.142<br>.1933  | -0.200<br>.0647  | -.241<br>.0253*  |
| GRBAS G            |       |                   |                |                    |                  |                  | 1.000           | .456<br>< .0001* | .341<br>.0013*   |
| VHI                |       |                   |                |                    |                  |                  |                 | 1.000            | .483<br>< .0001* |
| EAT-10             |       |                   |                |                    |                  |                  |                 |                  | 1.000            |

\* $p < .05$ .
