# Supplementary material
Source: publisher figshare collection journal article supplement (https://asha.figshare.com/articles/dataset/_/16589864)
Supplement: Supplementary file 8 [file 1]

**Supplemental Material S2.** Employment-related characteristics of participants with paid employment ( $n = 54$ ).

| <b>Characteristic</b>                           | <b>Full cohort<br/><math>n = 54</math></b> | <b>Therapy<br/><math>n = 28</math></b> | <b>Counseling<br/><math>n = 15</math></b> | <b>Evaluation<br/><math>n = 11</math></b> | <b><math>p</math> value</b> |
|-------------------------------------------------|--------------------------------------------|----------------------------------------|-------------------------------------------|-------------------------------------------|-----------------------------|
| Need voice for job,<br>$n$ (%)                  | 53 (98.2%)                                 | 27 (96.4%)                             | 15 (100.0%)                               | 11 (100.0%)                               | 1.0000                      |
| Cannot work on voice rest, $n$<br>(%)†          | 24 (45.3%)                                 | 16 (57.1%)                             | 3 (20.0%)                                 | 5 (50.0%)                                 | .0654                       |
| Any paid time off available, $n$<br>(%)         | 39 (72.2%)                                 | 21 (75.0%)                             | 13 (86.7%)                                | 5 (45.5%)                                 | .0832                       |
| Used paid time off for voice<br>rest, $n$ (%)   | 21 (38.9%)                                 | 11 (39.3%)                             | 7 (46.7%)                                 | 3 (27.3%)                                 | .6565                       |
| Used unpaid time off for voice<br>rest, $n$ (%) | 7 (13.0%)                                  | 5 (17.9%)                              | 1 (6.7%)                                  | 1 (9.1%)                                  | .5717                       |

*Note.* Results of Fisher's exact test.

†Missing answer for one participant.
